# Supplementary material
Source: publisher site journal article supplement (https://www.spandidos-publications.com/2213/downloadSupplementary)
Supplement: Supplementary file 1 [file downloadSupplementary]

Figure S1. The regions and corresponding sequences of SFRP promoters analyzed for methylation. (a) Regions and corresponding sequences of SFRP1, SFRP2, SFRP4 and SFRP5 analyzed for methylation-specific PCR. (b) Regions and corresponding sequences of the SFRP1 promoter analyzed for chromatin immunoprecipitation. SFRP, secreted frizzled-related protein. SFRP, secreted frizzled-related protein.

- A** SFRP1, Chromosome 8 (length: 126 bp) 41309333-41309459  
 CCTACGATCGAAAACGACGCGAACGAAAAACGACGCTACGAACTAAATACGCC  
 CCGACTCCCGAAAATACGACGAACAAAAAACGCGAACGACGAACGCGCGAC  
 ACTAACTCCGAAAACACTACA
- SFRP2, Chromosome 4 (length: 138 bp) 153788916-153789054  
 CCGCTCTCTTCGCTAAATACGACTCGAAACCCCGAAAACTAACAACCGACGACT  
 AAAACGCGAAAAAACGAAACACCGAAAAACAACGCGAACGAAACGCTACAA  
 ACCCGCGCGC AACTCCGAAA AACTCCGACCC
- SFRP4, Chromosome 7 (length: 112 bp) 37916853 -37916965  
 CCTCCCCTAACGTAAACTCGAAACGCTCCCTTAACAACACTACAACCGCGACGCGAA  
 CTCCCCCTCGACCGCCCCACCCCCAAACCCGTCGATACAAAAACGATAACATCAC  
 CC
- SFRP5, Chromosome 10 (length: 136) 97772023-97772159  
 ACTCCAACCCGAACCTCGCCGTACGCCCCAACCAATCTCCGACCGCCTAACCCCA  
 ACTCCAAAACGAAAAACAATAAAACGACCCCTCAACCCCTCCCGCACCCCTA  
 CCCGAACGTCCCGCCCAACGCCAAATCTT
- B** Chip, >NC\_000008.11:c41310926-41310658 Homo sapiens chromosome 8, GRCh38.p12  
 Primary Assembly (length: 269 bp)  
 CGCTCAGACTGGGCTATGAATATATCAGCCTCTCTCCACCCGCACTTAGGGACAGA  
 AGATATGGAGACTCCAGGAACCTTCATGAACATTTGCTGTGGTCTTCTGTCCCGGG  
 ATAGTCCGGGTCTCACTCCCAGCTCTCCAGAGCTTAACCCTCCCTCTCAGGGGAAT  
 GTTTGAAACCTACGAAGAATTCTCAGGAATTCGAGGTAGAAGGTGGCAGAGAGA  
 CTCTGTTCCTGGGGGCCGAGCTGTTGTGCTGATACCGTCCTCTTGG
